# Supplementary material for: Distinct profile of cell-free DNA in malignant pleural effusion of non-small cell lung cancer and its impact on clinical genetic testing
Source: PubMed Central journal article supplement (PMC7893565; doi:10.7150/ijms.52306), 2021-01-30
Supplement: ijmsv18p1510s1.pdf [file ijmsv18p1510s1.pdf]

## Supplementary Materials

### Supplementary Figures

**Supplementary Figure 1.** TMB distribution calculated from variants with VAF  $\geq 0.1\%$  among various sample types.

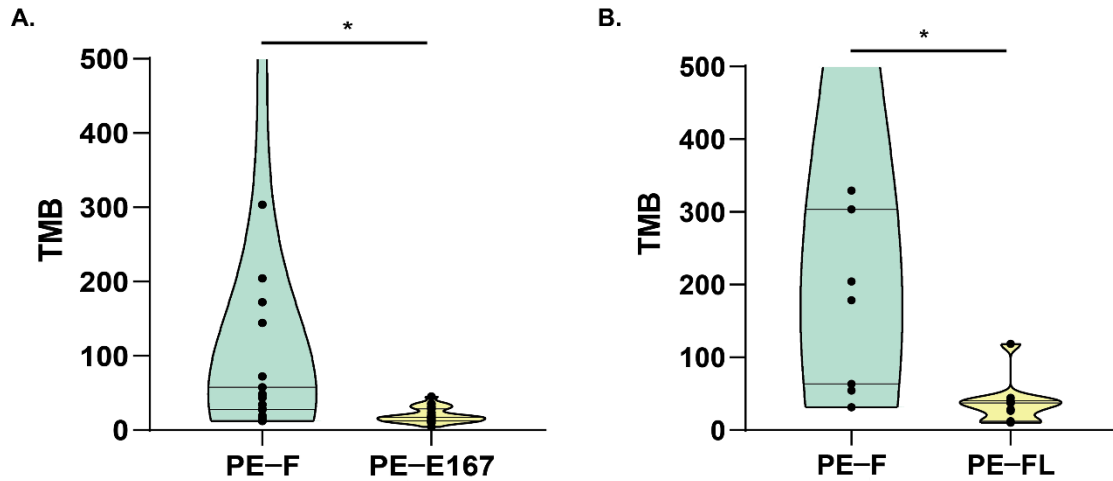

**Supplementary Figure 2.** Cancer unrelated variants with low allele frequency were dominant in PE-F and long fragment cfDNA.

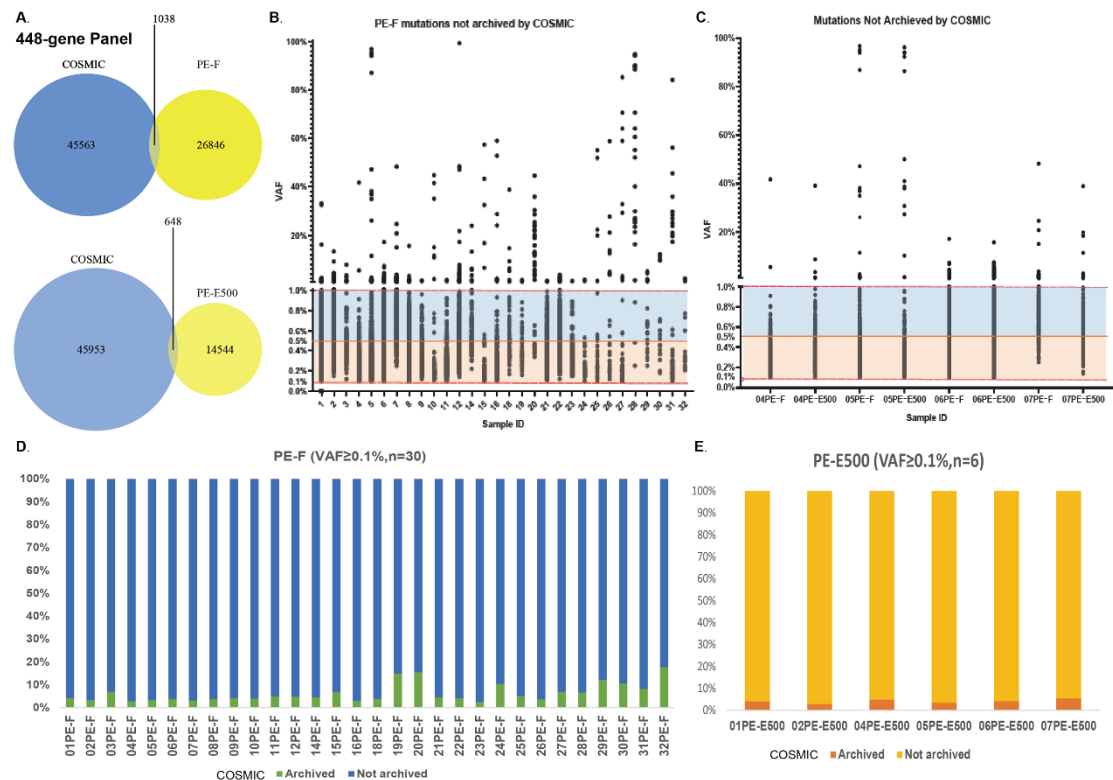

**Supplementary Figure 3.** Kaplan Meier progression-free survival curve for patients that have EGFR sensitive mutants, ALK or ROS1 fusion detected from PE-E167, PE-FL or clinical routine test.

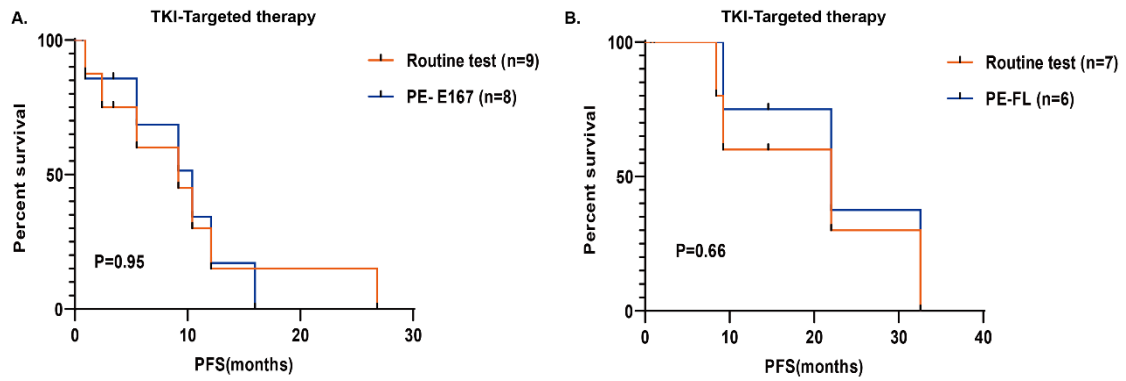

**Supplementary Table 1.** Genes detected by the 448-gene panel

|                |                 |                |               |                  |               |               |               |                |               |
|----------------|-----------------|----------------|---------------|------------------|---------------|---------------|---------------|----------------|---------------|
| <i>ABCB1</i>   | <i>BRD4</i>     | <i>CUL3</i>    | <i>FAS</i>    | <i>H3F3C</i>     | <i>KMT2D</i>  | <i>MYD88</i>  | <i>PIK3CG</i> | <i>RET</i>     | <i>STAT4</i>  |
| <i>ABL1</i>    | <i>BRIP1</i>    | <i>CYLD</i>    | <i>FAT1</i>   | <i>HAVCR2</i>    | <i>KRAS</i>   | <i>NBN</i>    | <i>PIK3R1</i> | <i>RHEB</i>    | <i>STK11</i>  |
| <i>ABL2</i>    | <i>BTG1</i>     | <i>CYP2D6</i>  | <i>FBXW7</i>  | <i>HGF</i>       | <i>LAG3</i>   | <i>NCOA3</i>  | <i>PIK3R2</i> | <i>RHOA</i>    | <i>SUFU</i>   |
| <i>ACVR1B</i>  | <i>BTK</i>      | <i>DAXX</i>    | <i>FCGR2B</i> | <i>HIST1H1C</i>  | <i>LATS1</i>  | <i>NCOR1</i>  | <i>PIM1</i>   | <i>RICTOR</i>  | <i>SUZ12</i>  |
| <i>AKT1</i>    | <i>C11orf30</i> | <i>DCUN1D1</i> | <i>FGF10</i>  | <i>HIST1H2BD</i> | <i>LATS2</i>  | <i>NF1</i>    | <i>PLCG2</i>  | <i>RIPK4</i>   | <i>SYK</i>    |
| <i>AKT2</i>    | <i>CALR</i>     | <i>DDR1</i>    | <i>FGF14</i>  | <i>HIST1H3B</i>  | <i>LCK</i>    | <i>NF2</i>    | <i>PLK2</i>   | <i>RIT1</i>    | <i>TAF1</i>   |
| <i>AKT3</i>    | <i>CARD11</i>   | <i>DDR2</i>    | <i>FGF19</i>  | <i>HLA-A</i>     | <i>LMO1</i>   | <i>NFE2L2</i> | <i>PMS1</i>   | <i>RNF43</i>   | <i>TAOK1</i>  |
| <i>ALK</i>     | <i>CASP8</i>    | <i>DICER1</i>  | <i>FGF23</i>  | <i>HNFI1A</i>    | <i>LRP1B</i>  | <i>NFKBIA</i> | <i>PMS2</i>   | <i>ROS1</i>    | <i>TBX3</i>   |
| <i>ALOX12B</i> | <i>CBFB</i>     | <i>DIS3</i>    | <i>FGF3</i>   | <i>HRAS</i>      | <i>LYN</i>    | <i>NKX2-1</i> | <i>PNRC1</i>  | <i>RPS6KB1</i> | <i>TCF7L1</i> |
| <i>AMER1</i>   | <i>CBL</i>      | <i>DNMT1</i>   | <i>FGF4</i>   | <i>HSD3B1</i>    | <i>LZTR1</i>  | <i>NOTCH1</i> | <i>POLD1</i>  | <i>RPS6KB2</i> | <i>TCF7L2</i> |
| <i>APC</i>     | <i>CCND1</i>    | <i>DNMT3A</i>  | <i>FGF6</i>   | <i>HSP90AA1</i>  | <i>MAGI2</i>  | <i>NOTCH2</i> | <i>POLE</i>   | <i>RPTOR</i>   | <i>TERC</i>   |
| <i>AR</i>      | <i>CCND2</i>    | <i>DOT1L</i>   | <i>FGF7</i>   | <i>ICOS</i>      | <i>MAP2K1</i> | <i>NOTCH3</i> | <i>POLE4</i>  | <i>RUNX1</i>   | <i>TERT</i>   |

|               |              |               |              |               |                |               |                |                |                 |
|---------------|--------------|---------------|--------------|---------------|----------------|---------------|----------------|----------------|-----------------|
| <i>ARAF</i>   | <i>CCND3</i> | <i>EGFR</i>   | <i>FGFR1</i> | <i>ICOSLG</i> | <i>MAP2K2</i>  | <i>NOTCH4</i> | <i>PPARG</i>   | <i>RUNX1T1</i> | <i>TET1</i>     |
| <i>ARFRP1</i> | <i>CCNE1</i> | <i>EIF4A2</i> | <i>FGFR2</i> | <i>IDH1</i>   | <i>MAP2K4</i>  | <i>NPM1</i>   | <i>PPP2R1A</i> | <i>SCN8A</i>   | <i>TET2</i>     |
| <i>ARID1A</i> | <i>CD274</i> | <i>EP300</i>  | <i>FGFR3</i> | <i>IDH2</i>   | <i>MAP3K1</i>  | <i>NRAS</i>   | <i>PRDM1</i>   | <i>SDHA</i>    | <i>TGFBR2</i>   |
| <i>ARID1B</i> | <i>CD79A</i> | <i>EPCAM</i>  | <i>FGFR4</i> | <i>IGF1</i>   | <i>MAP3K13</i> | <i>NSD1</i>   | <i>PREX2</i>   | <i>SDHAF2</i>  | <i>TIGIT</i>    |
| <i>ARID2</i>  | <i>CD79B</i> | <i>EPHA3</i>  | <i>FH</i>    | <i>IGF1R</i>  | <i>MAP3K14</i> | <i>NTRK1</i>  | <i>PRKAA1</i>  | <i>SDHB</i>    | <i>TMEM127</i>  |
| <i>ARID5B</i> | <i>CD80</i>  | <i>EPHA5</i>  | <i>FLCN</i>  | <i>IGF2</i>   | <i>MAPK1</i>   | <i>NTRK2</i>  | <i>PRKACA</i>  | <i>SDHC</i>    | <i>TMPRSS2</i>  |
| <i>ASXL1</i>  | <i>CD86</i>  | <i>EPHA6</i>  | <i>FLT1</i>  | <i>IKBKE</i>  | <i>MAPK3</i>   | <i>NTRK3</i>  | <i>PRKARIA</i> | <i>SDHD</i>    | <i>TNFAIP3</i>  |
| <i>ATM</i>    | <i>CDC73</i> | <i>EPHA7</i>  | <i>FLT3</i>  | <i>IKZF1</i>  | <i>MAPK4</i>   | <i>NUP93</i>  | <i>PRKCI</i>   | <i>SETBP1</i>  | <i>TNFRSF14</i> |
| <i>ATR</i>    | <i>CDH1</i>  | <i>EPHB1</i>  | <i>FLT4</i>  | <i>IL7R</i>   | <i>MAX</i>     | <i>OXSRI</i>  | <i>PRKDC</i>   | <i>SETD2</i>   | <i>TNFRSF18</i> |
| <i>ATRX</i>   | <i>CDK12</i> | <i>ERBB2</i>  | <i>FOXA1</i> | <i>INHBA</i>  | <i>MCL1</i>    | <i>PAK1</i>   | <i>PRSS8</i>   | <i>SF3B1</i>   | <i>TNFRSF9</i>  |
| <i>AURKA</i>  | <i>CDK4</i>  | <i>ERBB3</i>  | <i>FOXL2</i> | <i>INPP4A</i> | <i>MDC1</i>    | <i>PAK3</i>   | <i>PTCH1</i>   | <i>SIK1</i>    | <i>TOP1</i>     |
| <i>AURKB</i>  | <i>CDK6</i>  | <i>ERBB4</i>  | <i>FOXO1</i> | <i>INPP4B</i> | <i>MDM2</i>    | <i>PAK7</i>   | <i>PTEN</i>    | <i>SKP2</i>    | <i>TOP2A</i>    |
| <i>AXIN1</i>  | <i>CDK8</i>  | <i>ERCC1</i>  | <i>FOXP1</i> | <i>INSR</i>   | <i>MDM4</i>    | <i>PALB2</i>  | <i>PTPN11</i>  | <i>SLIT2</i>   | <i>TP53</i>     |

|                |               |                |               |              |               |                 |               |                |              |
|----------------|---------------|----------------|---------------|--------------|---------------|-----------------|---------------|----------------|--------------|
| <i>AXIN2</i>   | <i>CDKN1A</i> | <i>ERCC2</i>   | <i>FRS2</i>   | <i>IP6K1</i> | <i>MED12</i>  | <i>PAPPA2</i>   | <i>PTPRD</i>  | <i>SMAD2</i>   | <i>TRAF7</i> |
| <i>AXL</i>     | <i>CDKN1B</i> | <i>ERCC3</i>   | <i>FUBP1</i>  | <i>IRF2</i>  | <i>MEF2B</i>  | <i>PARK2</i>    | <i>PXDNL</i>  | <i>SMAD3</i>   | <i>TRRAP</i> |
| <i>B2M</i>     | <i>CDKN2A</i> | <i>ERG</i>     | <i>FYN</i>    | <i>IRF4</i>  | <i>MEN1</i>   | <i>PARP1</i>    | <i>QKI</i>    | <i>SMAD4</i>   | <i>TSC1</i>  |
| <i>BAP1</i>    | <i>CDKN2B</i> | <i>ERRF1</i>   | <i>GABRA6</i> | <i>IRS2</i>  | <i>MET</i>    | <i>PAX5</i>     | <i>RAC1</i>   | <i>SMARCA4</i> | <i>TSC2</i>  |
| <i>BARD1</i>   | <i>CDKN2C</i> | <i>ESR1</i>    | <i>GATA1</i>  | <i>JAK1</i>  | <i>MGA</i>    | <i>PAX8</i>     | <i>RAD21</i>  | <i>SMARCB1</i> | <i>TSHR</i>  |
| <i>BCL2</i>    | <i>CEBPA</i>  | <i>ETV1</i>    | <i>GATA2</i>  | <i>JAK2</i>  | <i>MITF</i>   | <i>PBRM1</i>    | <i>RAD50</i>  | <i>SMARCD1</i> | <i>U2AF1</i> |
| <i>BCL2L1</i>  | <i>CHD2</i>   | <i>ETV4</i>    | <i>GATA3</i>  | <i>JAK3</i>  | <i>MLH1</i>   | <i>PDCD1</i>    | <i>RAD51</i>  | <i>SMO</i>     | <i>VEGFA</i> |
| <i>BCL2L11</i> | <i>CHD4</i>   | <i>ETV5</i>    | <i>GATA4</i>  | <i>JUN</i>   | <i>MLH3</i>   | <i>PDCD1LG2</i> | <i>RAD51B</i> | <i>SNCAIP</i>  | <i>VHL</i>   |
| <i>BCL2L2</i>  | <i>CHEK1</i>  | <i>ETV6</i>    | <i>GATA6</i>  | <i>KDM5A</i> | <i>MPL</i>    | <i>PDGFRA</i>   | <i>RAD51C</i> | <i>SOCS1</i>   | <i>WISP3</i> |
| <i>BCL6</i>    | <i>CHEK2</i>  | <i>EZH2</i>    | <i>GLI1</i>   | <i>KDM5C</i> | <i>MRE11A</i> | <i>PDGFRB</i>   | <i>RAD51D</i> | <i>SOX10</i>   | <i>WT1</i>   |
| <i>BCOR</i>    | <i>CIC</i>    | <i>FAM175A</i> | <i>GNAI1</i>  | <i>KDM6A</i> | <i>MSH2</i>   | <i>PDK1</i>     | <i>RAD52</i>  | <i>SOX17</i>   | <i>XPC</i>   |
| <i>BCORL1</i>  | <i>CREBBP</i> | <i>FAM46C</i>  | <i>GNAI3</i>  | <i>KDR</i>   | <i>MSH3</i>   | <i>PDPK1</i>    | <i>RAD54L</i> | <i>SOX2</i>    | <i>XPO1</i>  |
| <i>BCR</i>     | <i>CRKL</i>   | <i>FANCA</i>   | <i>GNAQ</i>   | <i>KEAP1</i> | <i>MSH6</i>   | <i>PGR</i>      | <i>RAF1</i>   | <i>SOX9</i>    | <i>XRCC1</i> |

|               |               |               |               |              |              |                |               |              |               |
|---------------|---------------|---------------|---------------|--------------|--------------|----------------|---------------|--------------|---------------|
| <i>BIRC3</i>  | <i>CRLF2</i>  | <i>FANCC</i>  | <i>GNAS</i>   | <i>KEL</i>   | <i>MST1R</i> | <i>PHF6</i>    | <i>RANBP2</i> | <i>SPEN</i>  | <i>YES1</i>   |
| <i>BLM</i>    | <i>CSF1R</i>  | <i>FANCD2</i> | <i>GREM1</i>  | <i>KIT</i>   | <i>MTOR</i>  | <i>PIK3C2B</i> | <i>RARA</i>   | <i>SPOP</i>  | <i>ZBTB2</i>  |
| <i>BMPR1A</i> | <i>CSF3R</i>  | <i>FANCE</i>  | <i>GRIN2A</i> | <i>KLF4</i>  | <i>MUTYH</i> | <i>PIK3C2G</i> | <i>RASA1</i>  | <i>SPTA1</i> | <i>ZNF217</i> |
| <i>BRAF</i>   | <i>CTCF</i>   | <i>FANCF</i>  | <i>GRM3</i>   | <i>KLHL6</i> | <i>MYB</i>   | <i>PIK3C3</i>  | <i>RBI</i>    | <i>SRC</i>   | <i>ZNF703</i> |
| <i>BRCA1</i>  | <i>CTLA4</i>  | <i>FANCG</i>  | <i>GSK3B</i>  | <i>KMT2A</i> | <i>MYC</i>   | <i>PIK3CA</i>  | <i>RBM10</i>  | <i>SRSF2</i> | <i>ZRSR2</i>  |
| <i>BRCA2</i>  | <i>CTNNA1</i> | <i>FANCI</i>  | <i>GSTP1</i>  | <i>KMT2B</i> | <i>MYCL</i>  | <i>PIK3CB</i>  | <i>RECQL4</i> | <i>STAG2</i> |               |
| <i>BRD3</i>   | <i>CTNNB1</i> | <i>FANCL</i>  | <i>H3F3A</i>  | <i>KMT2C</i> | <i>MYCN</i>  | <i>PIK3CD</i>  | <i>REL</i>    | <i>STAT3</i> |               |

**Supplementary Table 2.** Genes detected by the 10-gene panel

|               |
|---------------|
| <i>ALK</i>    |
| <i>BRAF</i>   |
| <i>EGFR</i>   |
| <i>ERBB2</i>  |
| <i>KRAS</i>   |
| <i>MET</i>    |
| <i>NARS</i>   |
| <i>PIK3CA</i> |
| <i>RET</i>    |
| <i>ROS1</i>   |
